# Supplementary material for: Mass screening of rice mutant populations at low CO2 for identification of lowered photorespiration and respiration rates
Source: Frontiers journal article supplement (doi:10.3389/fpls.2023.1125770), 2023-03-03
Supplement: Data_Sheet_1.zip [file Data_Sheet_1.zip]

### Supplementary Table 3

Photosynthetic traits of chlorophyll retention mutant (CRM) rice lines relative to the parental wild type (WT) IR64-21 from light response curves (LRCs).

| Genotype | A <sub>max</sub> **       | QE**                    | LCP*                       | LSP*                           | Rd        |
|----------|---------------------------|-------------------------|----------------------------|--------------------------------|-----------|
| WT       | 38.04±1.04 <sup>bc</sup>  | 0.06±0.00 <sup>b</sup>  | 42.68±2.71 <sup>abcd</sup> | 688.17±28.53 <sup>abcd</sup>   | 2.58±0.21 |
| CRM 27   | 36.63±0.78 <sup>bc</sup>  | 0.05±0.00 <sup>ab</sup> | 34.50±2.23 <sup>abc</sup>  | 834.43±43.53 <sup>abcde</sup>  | 1.63±0.18 |
| CRM 29   | 42.60±0.15 <sup>bc</sup>  | 0.06±0.00 <sup>b</sup>  | 34.27±4.94 <sup>ab</sup>   | 702.00±15.04 <sup>abcde</sup>  | 2.20±0.35 |
| CRM 31   | 39.90±3.42 <sup>bc</sup>  | 0.06±0.01 <sup>b</sup>  | 34.33±2.02 <sup>ab</sup>   | 730.50±110.63 <sup>abcde</sup> | 2.08±0.34 |
| CRM 32   | 36.36±2.83 <sup>bc</sup>  | 0.06±0.01 <sup>b</sup>  | 37.26±7.23 <sup>abcd</sup> | 654.40±43.49 <sup>ab</sup>     | 2.08±0.22 |
| CRM 33   | 34.86±1.17 <sup>bc</sup>  | 0.06±0.00 <sup>b</sup>  | 32.98±1.82 <sup>ab</sup>   | 642.20±29.36 <sup>ab</sup>     | 1.88±0.07 |
| CRM 34   | 34.30±2.27 <sup>bc</sup>  | 0.06±0.01 <sup>ab</sup> | 27.33±3.99 <sup>a</sup>    | 689.50±84.67 <sup>abcde</sup>  | 1.59±0.39 |
| CRM 35   | 21.00±2.54 <sup>a</sup>   | 0.02±0.00 <sup>a</sup>  | 62.35±15.58 <sup>bd</sup>  | 944.20±19.67 <sup>abcde</sup>  | 1.67±0.33 |
| CRM 36   | 35.83±2.85 <sup>bc</sup>  | 0.06±0.01 <sup>b</sup>  | 32.15±2.07 <sup>ab</sup>   | 681.00±35.58 <sup>abc</sup>    | 1.77±0.13 |
| CRM 37   | 32.90±6.16 <sup>abc</sup> | 0.05±0.01 <sup>ab</sup> | 49.20±2.77 <sup>abcd</sup> | 773.67±98.00 <sup>abcde</sup>  | 2.34±0.61 |
| CRM 40   | 29.93±1.88 <sup>ab</sup>  | 0.04±0.00 <sup>ab</sup> | 46.10±9.04 <sup>abcd</sup> | 828.75±38.58 <sup>abcde</sup>  | 1.70±0.24 |
| CRM 43   | 48.57±6.40 <sup>c</sup>   | 0.05±0.01 <sup>ab</sup> | 31.47±4.62 <sup>ab</sup>   | 1025.67±184.79 <sup>ace</sup>  | 1.71±0.58 |
| CRM 68   | 31.10±4.20 <sup>ab</sup>  | 0.04±0.01 <sup>ab</sup> | 52.53±2.20 <sup>abcd</sup> | 926.33±144.18 <sup>abcde</sup> | 2.03±0.58 |
| Mean CRM | 35.33±1.97                | 0.05±0                  | 39.55±3.04                 | 785.67±36.38                   | 1.89±0.07 |

Means and standard error of the means are shown where  $n \geq 3$  for A<sub>max</sub> ( $\mu\text{mol m}^{-2} \text{s}^{-1}$ ): maximum assimilation rate; QE ( $\text{mol mol}^{-1}$ ): quantum use efficiency; LCP ( $\mu\text{mol m}^{-2} \text{s}^{-1}$ ): light compensation point; LSP ( $\mu\text{mol m}^{-2} \text{s}^{-1}$ ): light saturation point and; Rd ( $\mu\text{mol m}^{-2} \text{s}^{-1}$ ): dark respiration. \* and \*\* indicates significant differences between lines according to ANOVA at  $P < 0.01$  and  $P < 0.001$ , respectively ( $p < 0.05$ ). Letters indicating differences according to post-hoc Bonferroni test.
